# Supplementary material
Source: PubMed Central journal article supplement (PMC5414566)
Supplement: jciinsight-2-91981-s001.pdf [file jciinsight-2-91981-s001.pdf]

# Supplemental Material

## Supplemental Figure 1

**A**

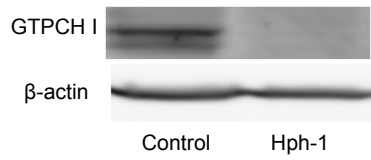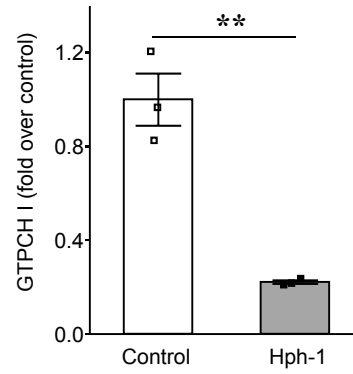

**B**

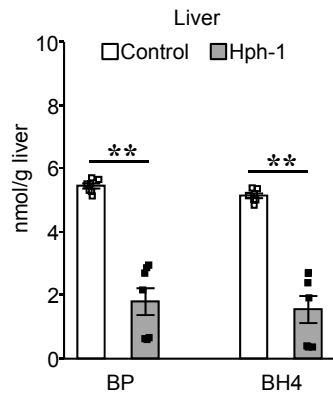

**C**

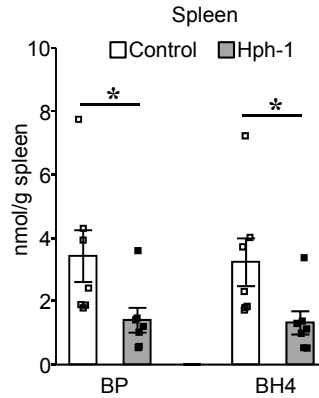

**D**

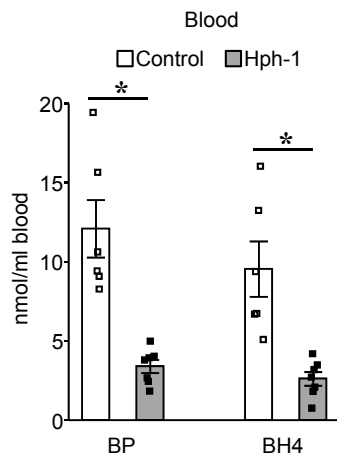

**E**

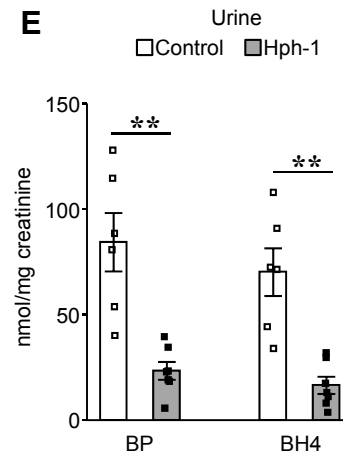

**Supplemental Figure 1. Phenotype of hph-1 mice.**

(A) Protein expression levels of GTPCH I in liver tissue of hph-1 mice and control mice of the same background at 6 weeks of age ( $n = 3$ ). (B-E) Total biopterin (BP) and tetrahydrobiopterin (BH4) levels in liver (B;  $n = 7$ ), spleen (C;  $n = 7$ ), blood (D;  $n = 6-7$ ), and urine (E;  $n = 6-7$ ) of hph-1 mice and control mice of the same background at 6 weeks of age. Values are means  $\pm$  SEM. All statistical analysis was performed by Student t-test,  $*P < 0.05$ ,  $**P < 0.01$  vs. control group.

## Supplemental Figure 2

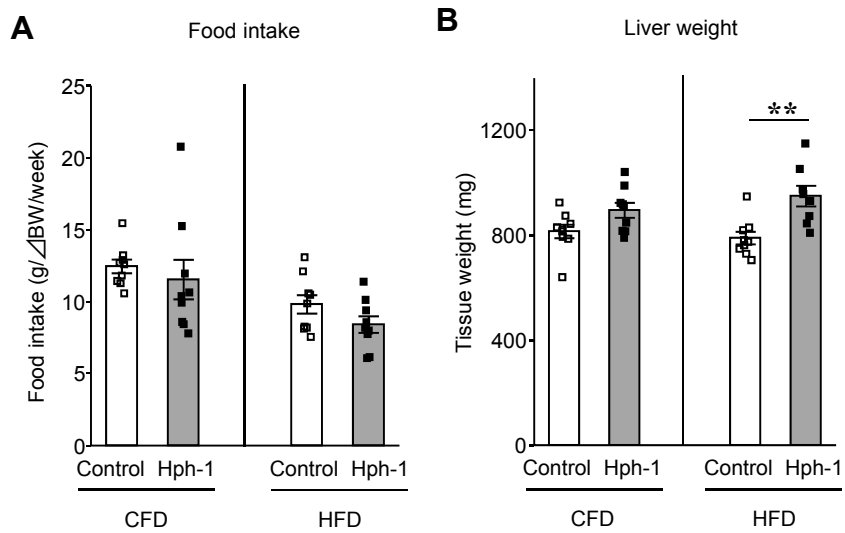

### Supplemental Figure 2. Phenotype of BH4-deficient mice under CFD or HFD.

(A-B) Food intake (A;  $n = 9$ ) and liver weight (B;  $n = 8-9$ ) in *hph-1* mice and control mice of the same background under the control fat diet (CFD) or high fat diet (HFD) for 4 weeks from the age of 4 weeks. Values are means  $\pm$  SEM. All statistical analysis was performed by Student t-test,  $**P < 0.01$  vs. control group.

## Supplemental Figure 3

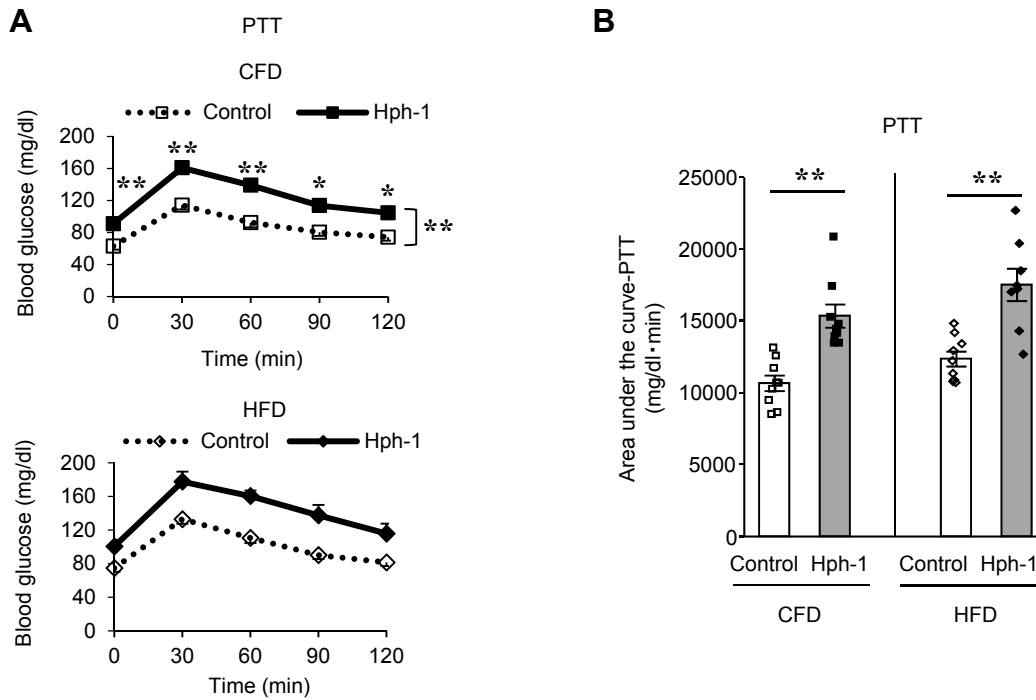

### Supplemental Figure 3. Phenotype of gluconeogenesis in BH4-deficient mice under CFD or HFD.

(A-B) Pyruvate tolerance test (PTT; 1 g/kg pyruvate) after 16 h fasting (A-B;  $n = 8-9$ ) under control fat diet (CFD) or high fat diet (HFD) for 4 weeks from the age of 4 weeks. Values are means  $\pm$  SEM. Statistical analysis was performed by two-way ANOVA with Bonferroni post-hoc test (A) or Student t-test (B),  $*P < 0.05$ ,  $**P < 0.01$  vs. control group.

## Supplemental Figure 4

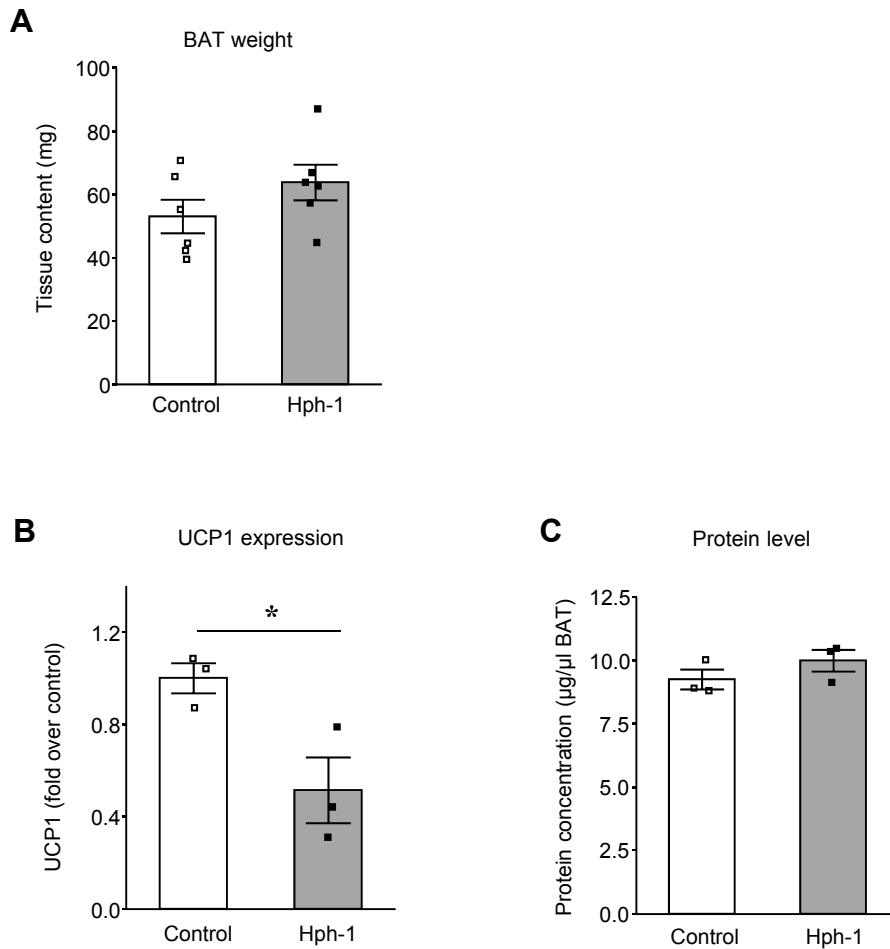

### Supplemental Figure 4. Phenotype of BAT in BH4-deficient mice.

(A-C) Brown adipose tissue (BAT) weight (A;  $n = 6$ ), the total amount of UCP1 protein expression levels per mouse (B;  $n = 3$ ) and protein concentrations (C;  $n = 3$ ) in half of the interscapular BAT of hph-1 mice and control mice of the same background at 6 weeks of age under control fat diet. The total amount of UCP1 protein expression level per mouse was calculated as UCP1 protein expression per  $10 \mu\text{g} \times$  protein concentration per mouse. Values are means  $\pm$  SEM. All statistical analysis was performed by Student t-test,  $*P < 0.05$  vs. control group.

## Supplemental Figure 5

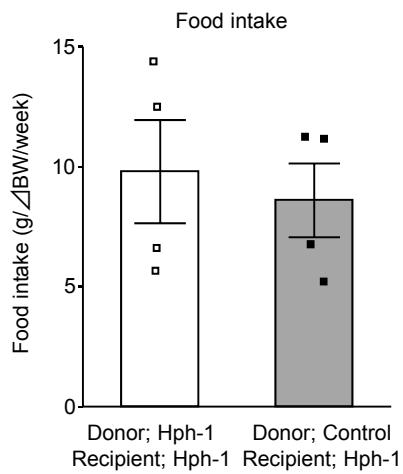

### Supplemental Figure 5. Food intake of BH4-deficient mice after BAT transplantation.

Food intake in hph-1 mice transplanted with 0.1 g brown adipose tissue (BAT) derived from hph-1 mice or control mice of the same background under high fat diet from the age of 8 weeks ( $n = 4$ ).

Values are means  $\pm$  SEM. Statistical analysis was performed by Student t-test, vs. control group.

## Supplemental Figure 6

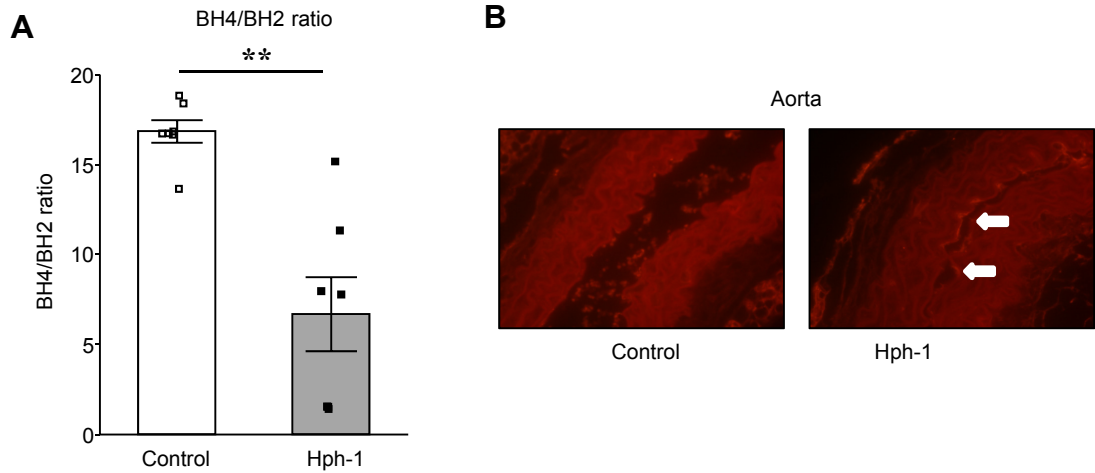

### Supplemental Figure 6. Indication of eNOS uncoupling in BH4-deficient mice.

(A) Tetrahydrobiopterin (BH4)/ 7,8-dihydrobiopterin (BH2) ratio in liver tissue of hph-1 mice and control mice of the same background at 6 weeks of age ( $n = 7$ ). (B) Anti-nitrotyrosine staining in aorta of streptozotocin (STZ)-induced diabetic hph-1 mice and control mice of the same background, 4 weeks after the single administration of 120 mg STZ /kg body weight from the age of 6 weeks. Arrows indicate the stained areas with anti-nitrotyrosine antibody (original magnification,  $\times 40$ ). Values are means  $\pm$  SEM. Statistical analysis was performed by Student t-test,  $**P < 0.01$  vs. control group.

## Supplemental Figure 7

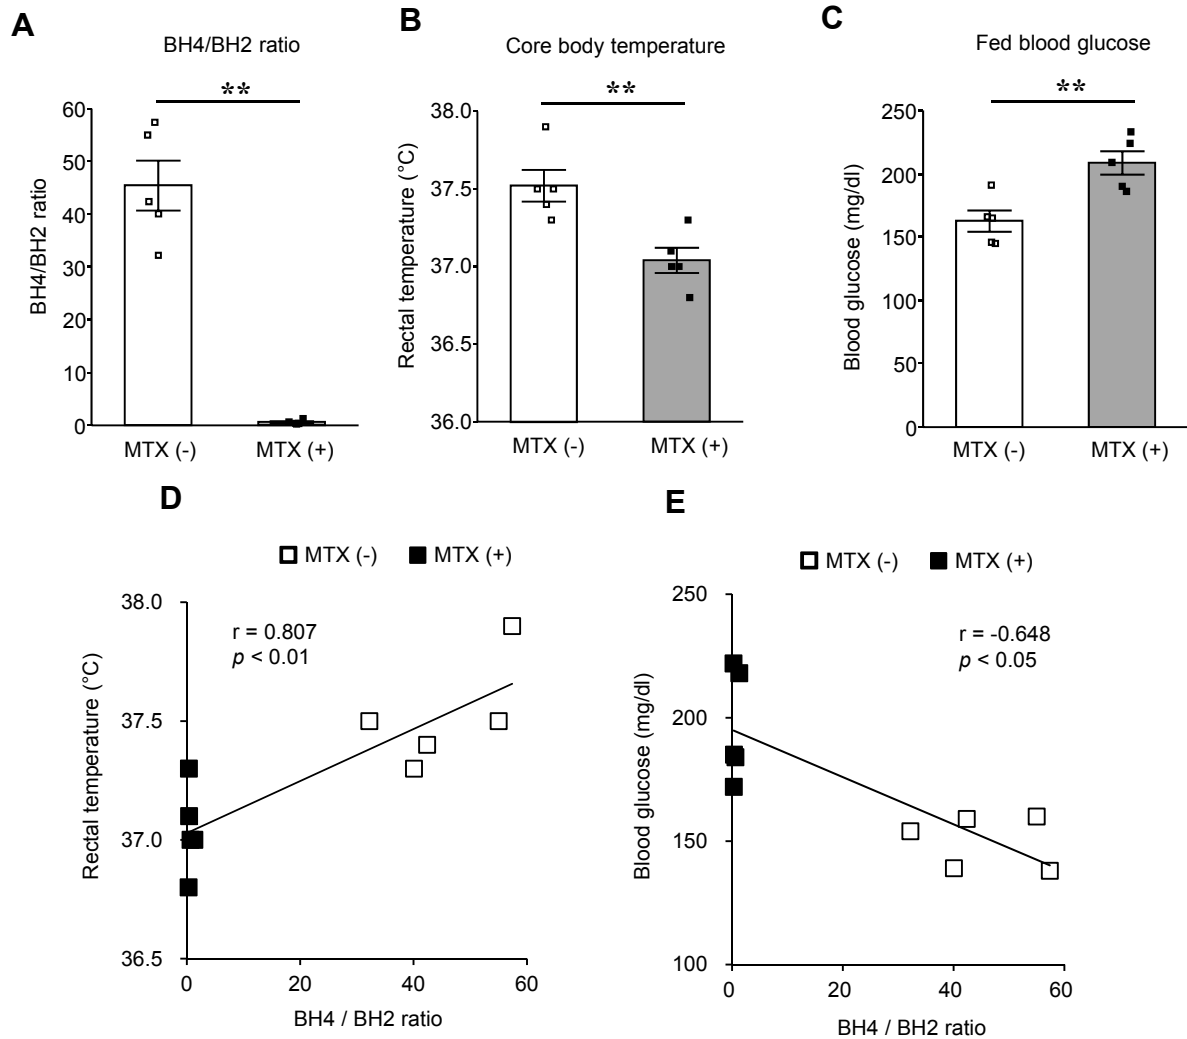

### Supplemental Figure 7. Relationship between BH4/BH2 ratio as a marker of eNOS uncoupling and energy metabolism.

(A-E) Tetrahydrobiopterin (BH4)/ 7,8-dihydrobiopterin (BH2) ratio in liver tissue (A ;  $n = 5$ ), rectal temperature (B ;  $n = 5$ ), fed blood glucose levels (C ;  $n = 5$ ), and correlation between BH4/BH2 ratio and rectal temperature (D ;  $n = 5$ ) and fed blood glucose levels (E ;  $n = 5$ ) in hph-1 mice 2 weeks after the injection of 2 mg methotrexate (MTX) /kg body weight every 2 days from the age of 5 weeks. Values are means  $\pm$  SEM. Statistical analysis was performed by Student t-test (A-C),  $**P < 0.01$  vs. control group, or Correlation coefficient, Spearman's rank correlation coefficient (D-E).



## Supplemental Figure 8

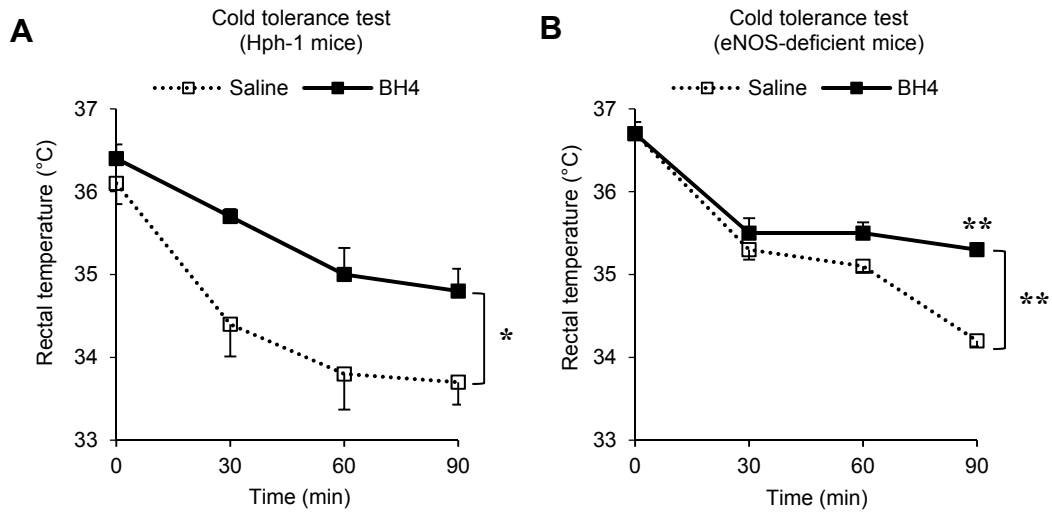

**Supplemental Figure 8. Effects of single administration of BH4 on thermogenic response in BH4-deficient mice and eNOS-deficient mice.**

(A-B) Changes of rectal temperature in 4°C cold tolerance test in hph-1 mice (A;  $n = 5$ ) and eNOS-deficient mice (B;  $n = 5-7$ ) at 6 weeks of age after the single administration of 20 mg tetrahydrobiopterin (BH4)/kg body weight. Values are means  $\pm$  SEM. All statistical analysis was performed by two-way ANOVA with Bonferroni post-hoc test,  $*P < 0.05$ ,  $**P < 0.01$  vs. saline group.

## Supplemental Figure 9

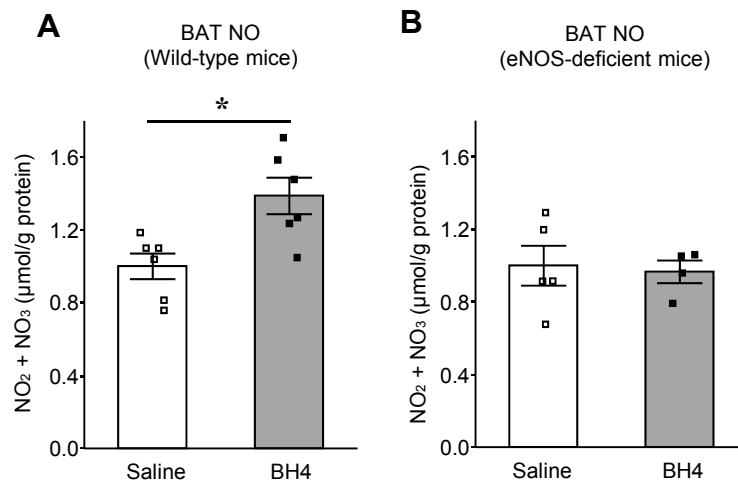

**Supplemental Figure 9. Effects of single administration of BH4 on NO production in BAT of eNOS-deficient mice.**

(A-B) Nitric oxide (NO) contents of brown adipose tissue (BAT) in wild-type mice (A;  $n = 6$ ) and eNOS-deficient mice at 6 weeks of age (B;  $n = 4-5$ ) after treatment with or without 20 mg tetrahydrobiopterin (BH4)/kg body weight. Values are means  $\pm$  SEM. All statistical analysis was performed by Student t-test,  $*P < 0.05$  vs. saline group.

# Supplemental Figure 10

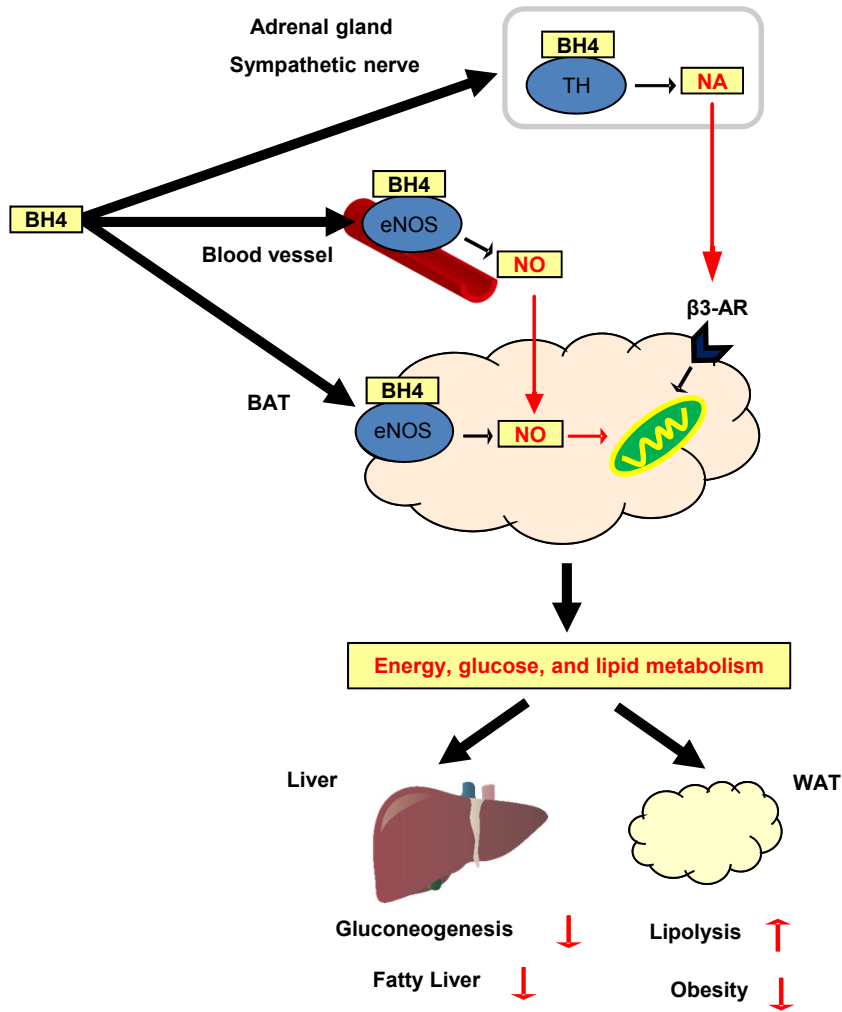

Supplemental Figure 10. Model of BAT-mediated metabolic regulation by BH4.

## Supplemental tables

**Supplemental Table 1. Primer sequences used in quantitative RT-PCR.**

| Name          | Forward                | Reverse                |
|---------------|------------------------|------------------------|
| <i>Gch1</i>   | CAAGCAAGTCCTTGGTCTCAG  | ACCGCAATCTGTTTGGTGAG   |
| <i>Ucp1</i>   | ACTGCCACACCTCCAGTCATT  | CTTGCCTCACTCAGGATTGG   |
| <i>Prdm16</i> | CAGCACGGTGAAGCCATTC    | GCGTGCATCCGCTTGTG      |
| <i>Pgcl1a</i> | CCCTGCCATTGTTAAGACC    | TGCTGCTGTTCTGTTTTTC    |
| <i>Dio2</i>   | AGCCCATGTAACCAGCACCGGA | CAGTCGCACTGGCTCAGGAC   |
| <i>Cpt1b</i>  | CTGTTAGGCCTCAACACCGAAC | CTGTCATGGCTAGGCGGTACAT |
| <i>36B4</i>   | TGTGTGTCTGCAGATCGGGTAC | CTTTGGCGGGATTAGTCGAAG  |

**Supplemental Table 2. Characteristics of hph-1 mice.**

|        | Body weight (g) | Fed blood glucose (mg/dl) |
|--------|-----------------|---------------------------|
| Saline | 16.00 ± 0.59    | 171.63 ± 4.46             |
| BH4    | 16.08 ± 0.51    | 174.13 ± 4.47             |

Values are means ± SEM ( $n = 8$ ).

No significant difference between saline and tetrahydrobiopterin (BH4) groups, Student t-test.
